# Supplementary figures and images for: Puffer Fish Gut Microbiota Studies Revealed Unique Bacterial Co-Occurrence Patterns and New Insights on Tetrodotoxin Producers
Source: MDPI journal article supplement (doi:10.3390/md18050278), 2020-05-25

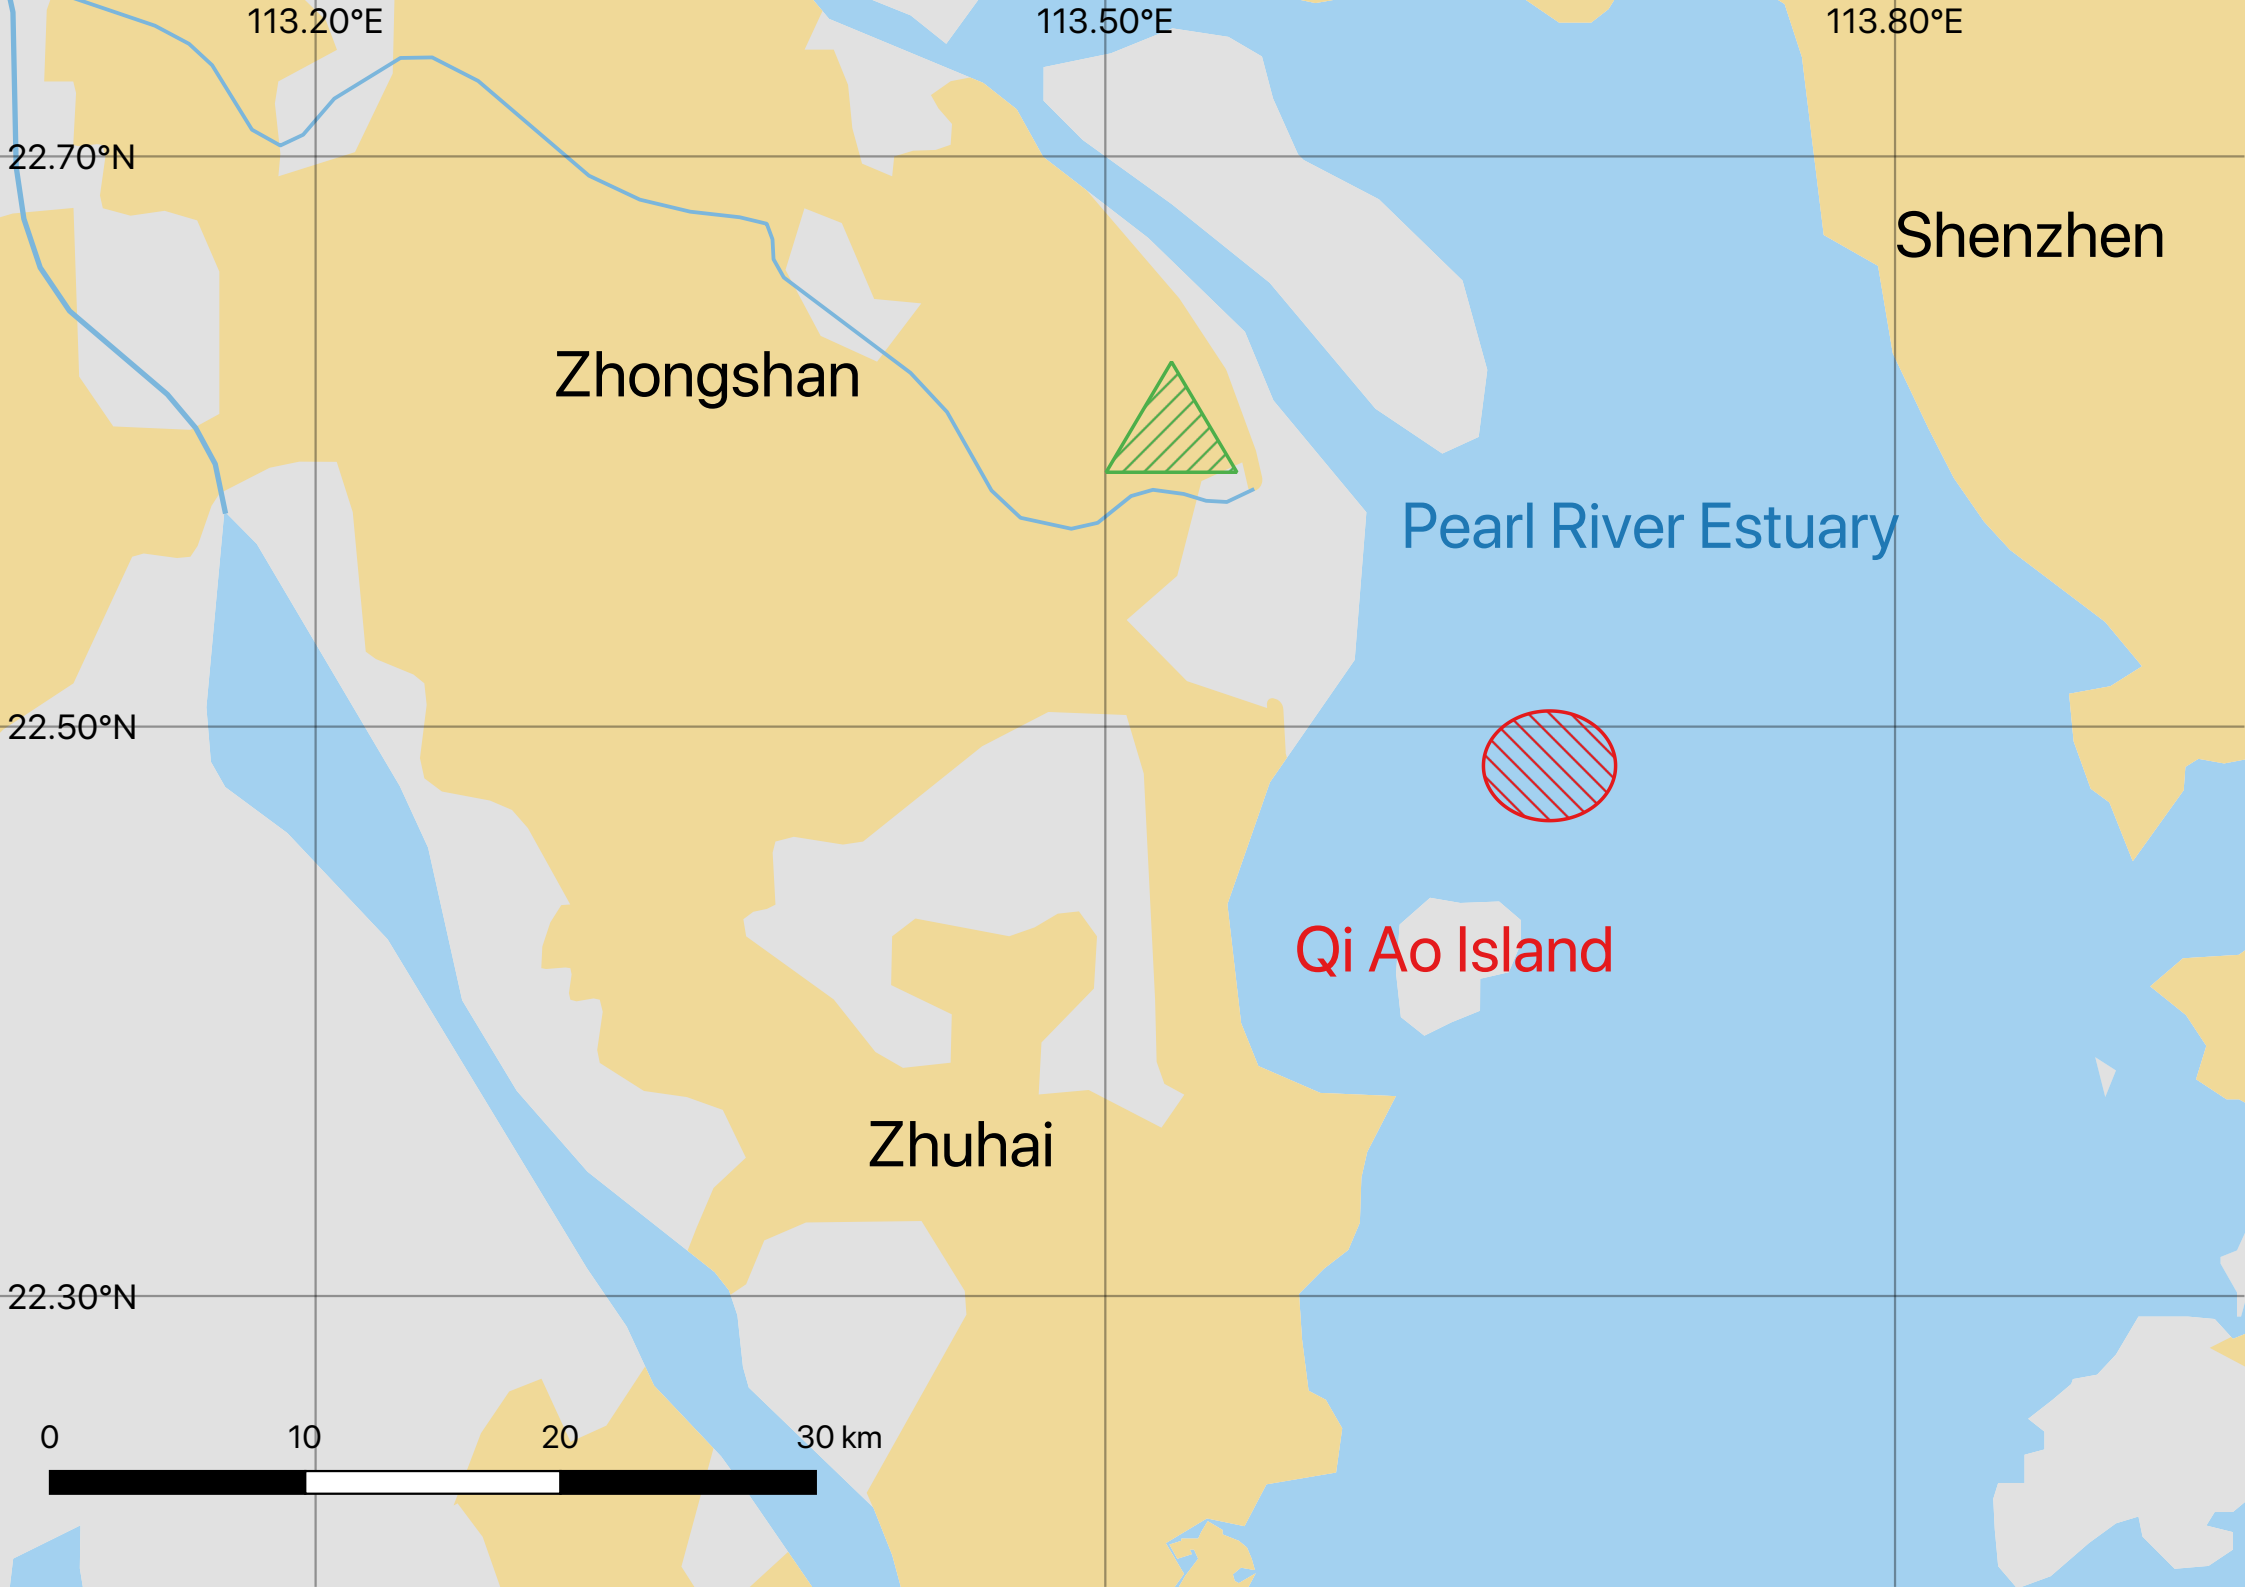

Supplement: s1 [file s1]

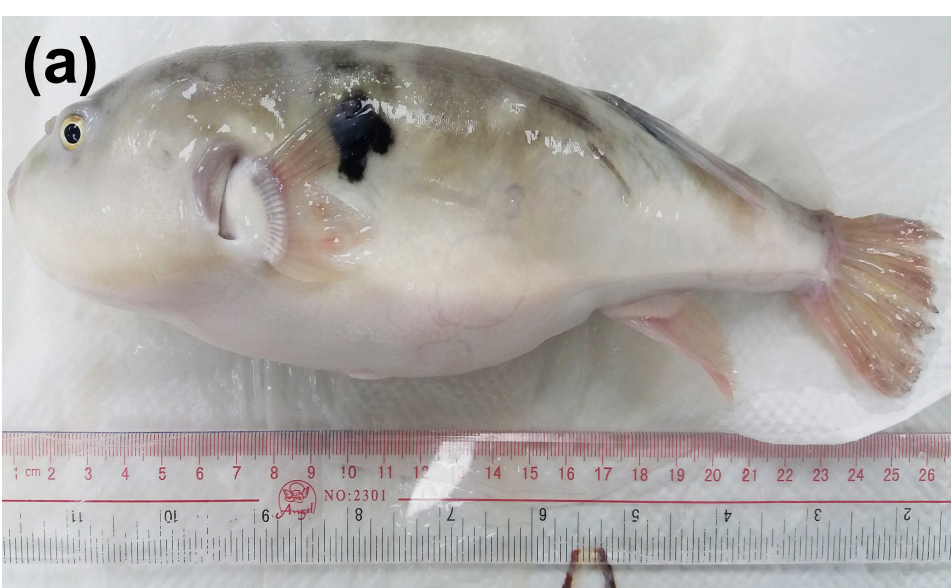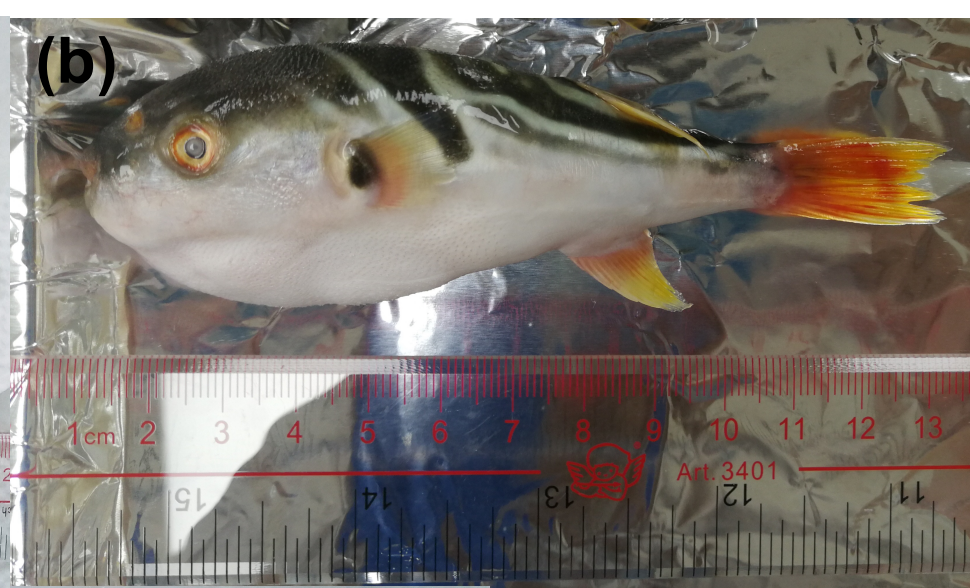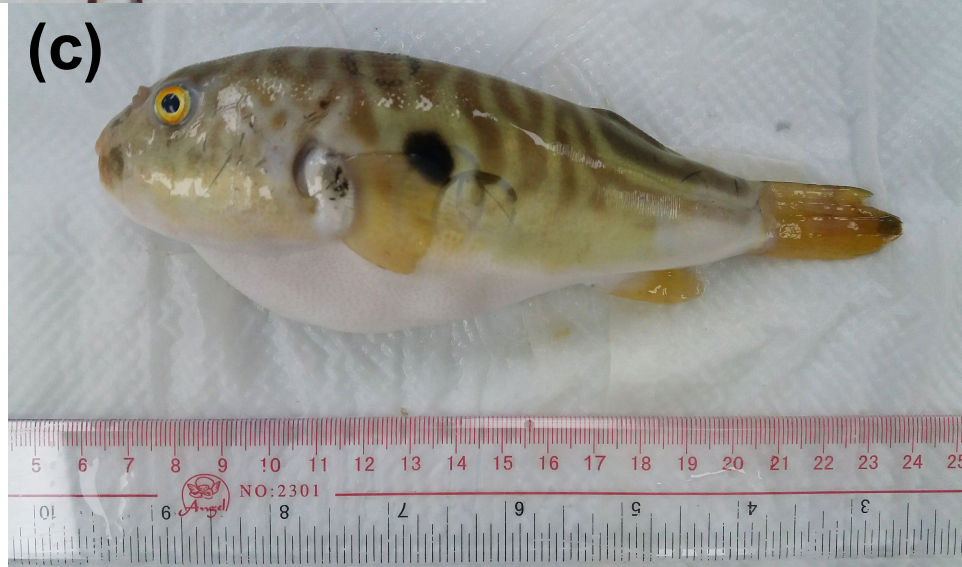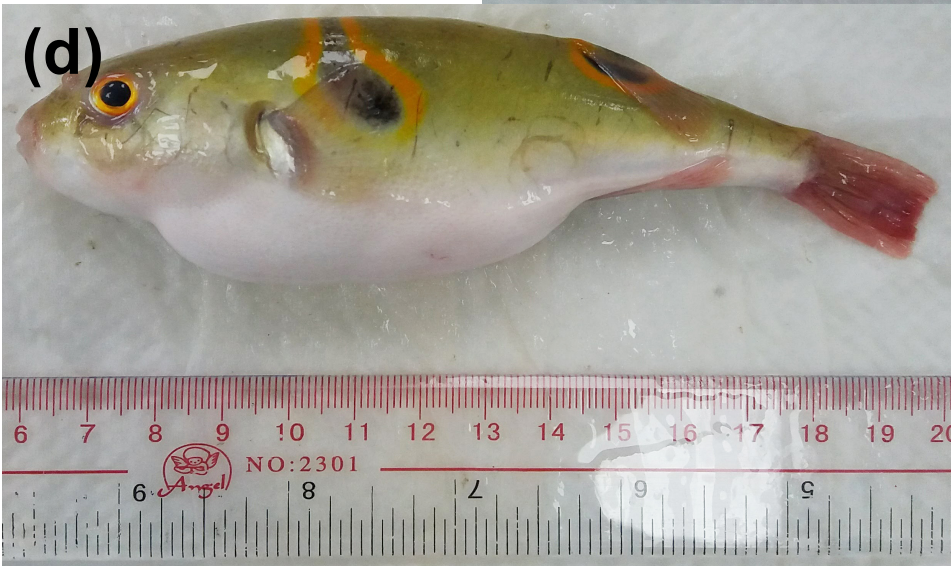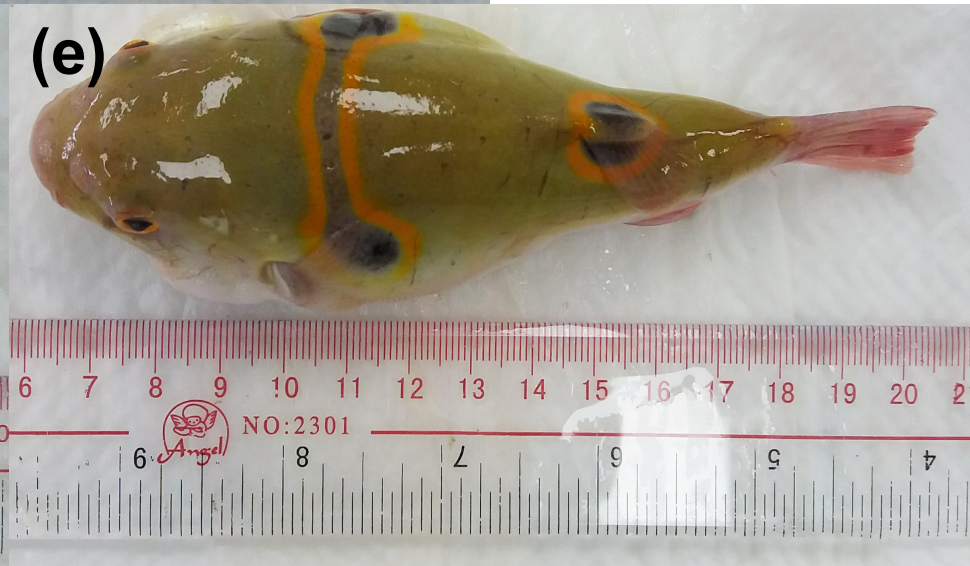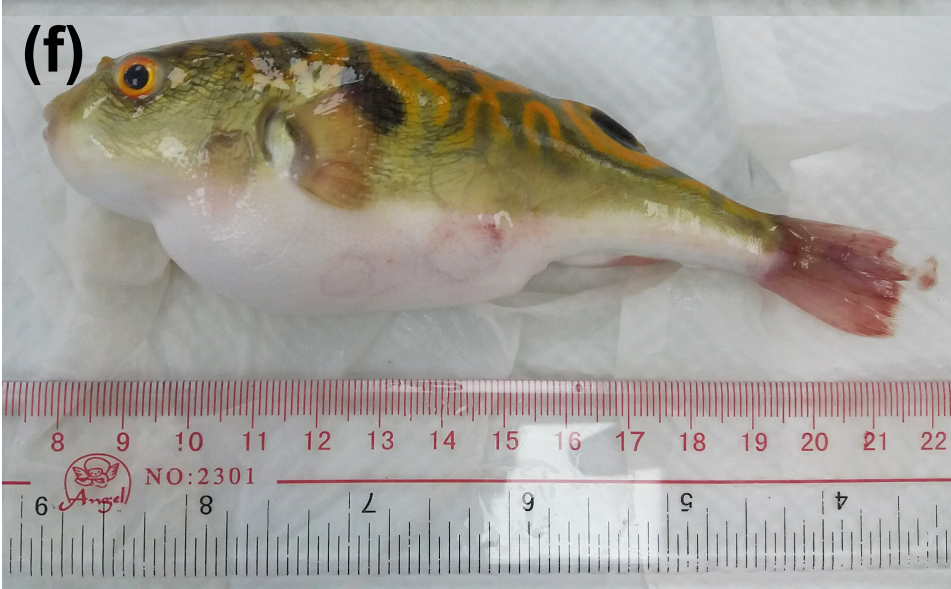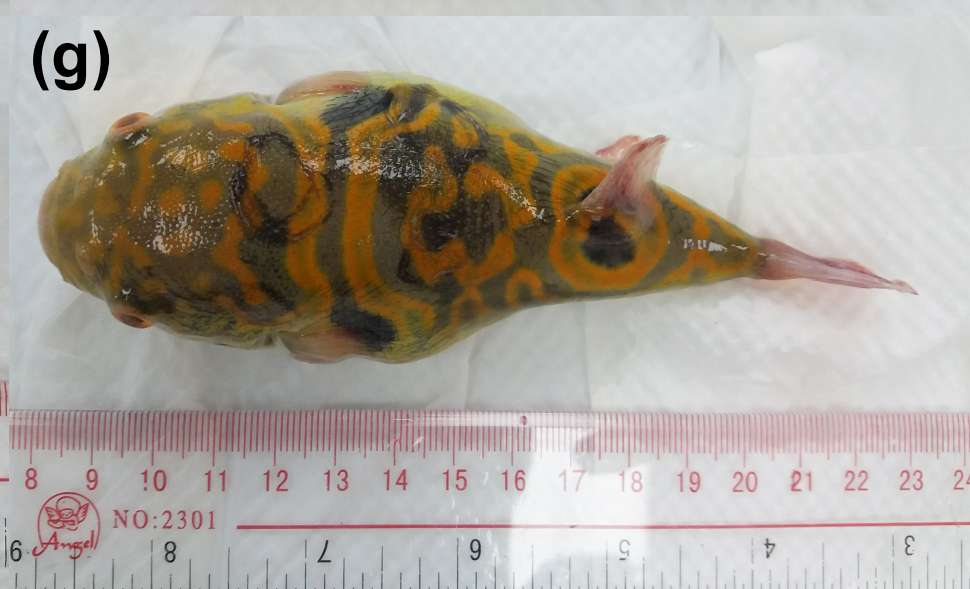

Supplement: s1 [file s1]
